# Supplementary material
Source: PubMed Central journal article supplement (PMC5839504)
Supplement: NIHMS926733-supplement-supplement_1.pdf [file NIHMS926733-supplement-supplement_1.pdf]

## SUPPLEMENTAL FIGURE LEGENDS

### **Figure S1. Structure of Ku-TLC1<sub>KBS</sub> and Comparison with Human Ku-dsDNA, Related to Figure 1.**

(A) Electron density map of TLC1<sub>KBS</sub>. Stereo view of the Sigma-A weighted 2Fo-Fc map that shows nucleotides 288-312 of TLC1<sub>KBS</sub> are ordered in the crystal. Refined model of TLC1<sub>KBS</sub> is superimposed on the electron density map. Contours are drawn at the 1.0  $\sigma$  level. (B) Bar diagram and the structure of Ku70. From the N- to C-termini, the vWA domain, the BBD domain, the insertion, and the CTD motif are colored in light green, green, pink, and dark green, respectively. (C) Bar diagram and the structure of Ku80. From the N- to C-termini, the vWA domain, the BBD domain, the insertion, and the CTD motif are colored in light blue, blue, purple, and dark blue, respectively. (D and E) Structural comparison of yeast Ku70/80-TLC1<sub>KBS</sub> complex and human Ku70/80-dsDNA Complex. Two orthogonal views of the structure of human Ku70/80-dsDNA complexes (D) and yeast Ku70/80-TLC1<sub>KBS</sub> complexes (E), respectively.

### **Figure S2. ITC Measurement of the Interactions between Ku70/80 and Wild-type and Mutant TLC1<sub>KBS</sub> and Proposed Secondary Structures of TLC1<sub>KBS</sub> Orthologs, Related to Figure 2.**

(A) TLC1<sub>KBS</sub> (nt 288-312) binds to Ku70/80 equally well as KBS-48nt (nt 278-325) and the mutants of TLC1<sub>KBS</sub> disrupt or weaker its interaction with Ku70/80, consistent with the Ku70/80-TLC1<sub>KBS</sub> complex structure analyses. (B) Sequence analysis of predicted TLC1<sub>KBS</sub> RNAs from different yeast species clearly showed that, except for the terminal loop, the sequence of TLC1<sub>KBS</sub> is highly conserved in the *Saccharomyces* clade.

**Figure S3. Structural Analyses of the Ku80<sub>vWA</sub>-Sir4<sub>KBM</sub> Interaction, Related to Figure 3.**

**(A and B)** Characterization of the interaction between Ku80 and Sir4, and analysis of the mutant Ku80<sub>vWA</sub>-Sir4<sub>KBM</sub> interactions by yeast two-hybrid assay. Data are average of three independent  $\beta$ -galactosidase measurements. Error bars in the graph represent standard errors of the mean (SEM). **(C)** Electron density map of the Sir4<sub>KBM</sub> peptide. The Sigma-A weighted 2Fo-Fc map that shows residues 100-115 of Sir4<sub>KBM</sub> are ordered in the crystal. The refined model of Sir4<sub>KBM</sub> is superimposed on the electron density map. Contours are drawn at the 1.0  $\sigma$  level. **(D)** Sir4<sub>KBM</sub>, TLC1<sub>KBS</sub> and Ku70/80 form a quaternary complex. GST-Sir4<sub>KBM</sub> was used to pull down Ku70/80 and TLC1<sub>KBS</sub>. Proteins were visualized on SDS-PAGE by Coomassie blue staining, and the TLC1<sub>KBS</sub> RNA were visualized on 8 M urea PAGE by SYBR<sup>®</sup> Gold staining. **(E)** ITC measurements of the interactions between wild-type and mutant Ku80<sub>vWA</sub> and Sir4<sub>KBM</sub>.

**Figure S4. Functional Analysis of the Ku80<sub>vWA</sub>-Sir4<sub>KBM</sub> Interaction, Related to Figure 4.**

**(A and B)** Mutants that disrupt Ku80-Sir4 interaction do not show senescence phenotype. A *sir4-null* strain was transformed with *CEN* plasmids expressing either WT or mutant Sir4. The cells were serially re-streaked four times and plated at streak 5 (A). A *ku80-null* strain was transformed with *CEN* plasmids expressing either wild-type or mutant Ku80. The cells were serially re-streaked for 4 times and plated at streak 5 (B). **(C)** The interaction between Ku80 and Sir4 is required for telomere silencing. Top: Wild-type telomere end protection in strains bearing mutations in

*KU80* integrated at the endogenous locus that disrupt the Ku80-Sir4 interaction, as revealed by normal growth at restrictive temperature (37 °C). Shown are five-fold serial dilutions of wild-type, mutant, or null strains plated on YPD at 28 °C (to monitor plating efficiency) and 37 °C. Bottom: Derepression of *URA3* telomeric reporters in strains bearing mutations in *KU80* that disrupt the Ku80-Sir4 interaction integrated at the endogenous locus. Shown are five-fold serial dilutions of wild-type, mutant, or null strains on media lacking uracil (-Ura; to monitor plating efficiency) or containing 5-fluorotic acid (5-FOA), as indicated. **(D)** The interaction between Ku80 and Sir4 is not required for Ku's role in telomere end protection or NHEJ. Wild-type NHEJ in strains bearing mutations in *KU80* that disrupt the Ku80-Sir4 interaction integrated at the endogenous locus, as revealed by growth in the presence of constitutively expressed HO endonuclease (+HO). Shown are five-fold serial dilutions of wild-type, mutant, or null strains plated on YPD (to monitor plating efficiency) and YPGal, as indicated.

**Figure S5. Primary Sequence Analysis of Est1 Proteins and Characterization of *K/Cdc13*<sub>EBM</sub>, Related to Figure 5.**

**(A)** Multiple sequence alignment of Est1 family members. The secondary structures ( $\alpha$ ,  $\alpha$ -helix;  $\beta$ ,  $\alpha$ -strand;  $\eta$ ,  $3_{10}$ -helix) of *K/Est1* are labeled on the top of each bars. Conserved residues are boxed and highlighted in red. **(B)** Protein folding analysis of *ScEst1* and *K/Est1* by the PONDR-Fit program. The analysis results show that the C-terminal regions of most Est1 proteins are disordered. **(C)** ITC measurement of the interactions between *K/Est1* and different fragments of *K/Cdc13* within *K/Cdc13*<sub>RD</sub>.

**Figure S6. Crystallographic and mutational analyses of the *K/Est1-K/Cdc13<sub>EBM</sub>* interaction, Related to Figure 5.**

(A) Electron density map of the *K/Cdc13<sub>EBM</sub>* peptide in the *K/Est1-K/Cdc13<sub>EBM</sub>* complex. Stereo view of the Sigma-A weighted 2Fo-Fc map that shows of *K/Cdc13<sub>EBM-N</sub>* (residues 213-222) and *K/Cdc13<sub>EBM-C</sub>* (residues 232–238) of *K/Cdc13<sub>EBM</sub>* are ordered in the crystal. Refined models of *K/Cdc13<sub>EBM-N</sub>* and *K/Cdc13<sub>EBM-C</sub>* are superimposed on the electron density map. Contours are drawn at the 1.0  $\sigma$  level. (B) ITC measurement of the wild-type and mutant *K/Est1-K/Cdc13<sub>EBM</sub>* interactions.

**Figure S7. Functional Analysis of the *K/Est1-K/Cdc13<sub>EBM</sub>* Interaction, Related to Figure 6.**

(A) Mutations in *Cdc13<sub>EBM-N</sub>* do not show senescence phenotype. A *CDC13/cdc13 $\Delta$*  diploid strain was transformed with *CEN CDC13* (or mutant *cdc13*), and then was sporulated and dissected. Cells were taken from serial streaks 2, 4, 6 and 8. (B) *Cdc13-F237A* and *-E252K* mutant proteins are expressed at the wild-type level. Upper panel: Myc-tagged *Cdc13-WT*, *-F237A*, and *-E252K* proteins were ectopically expressed under control of the native *Cdc13* promoter using a *CEN* vector introduced into the *cdc13 $\Delta$*  strain. The expression level was verified by quantitative western blot using anti-Myc antibody and IRDye conjugated secondary antibody. Wild-type *Cdc13* protein with identical 18xMyc tag expressed from native genomic locus served as endogenous control. Fluorescence signal in the linear range was normalized to that of the loading control. Lower panel: Mean expression levels for three independent clones of each strain are plotted, the error bars are SEM. (C) *Cdc13-F237A* and *-E252K* Mutant Proteins Exhibit Nearly Wild-type Level of Telomere Binding. *Cdc13-*

Myc ChIP-qPCR assay performed with asynchronous yeast cultures using the complementation system described in (B). The mean values of % input recovered for three independent clones for each strain are plotted. The error bars are SEM. *ARO1* is a non-telomeric locus control. IgG control for non-specific binding was performed with the *CDC13-WT* strain. **(D)** Disruption of both the TLC1-Ku70/80-Sir4 and the Est1-Cdc13 pathways resulted in critically short telomeres. Measurement of average telomere length of yeast strains shown in Figure 6C and 6D taken from streak 6 (wild-type, *cdc13*<sup>F237A</sup> and *tlc1*<sup>AAU</sup>) or streak 4 (for strains with senescence phenotype). Telomere length was calculated from three independent experiments (mean ± SEM).

Figure S1

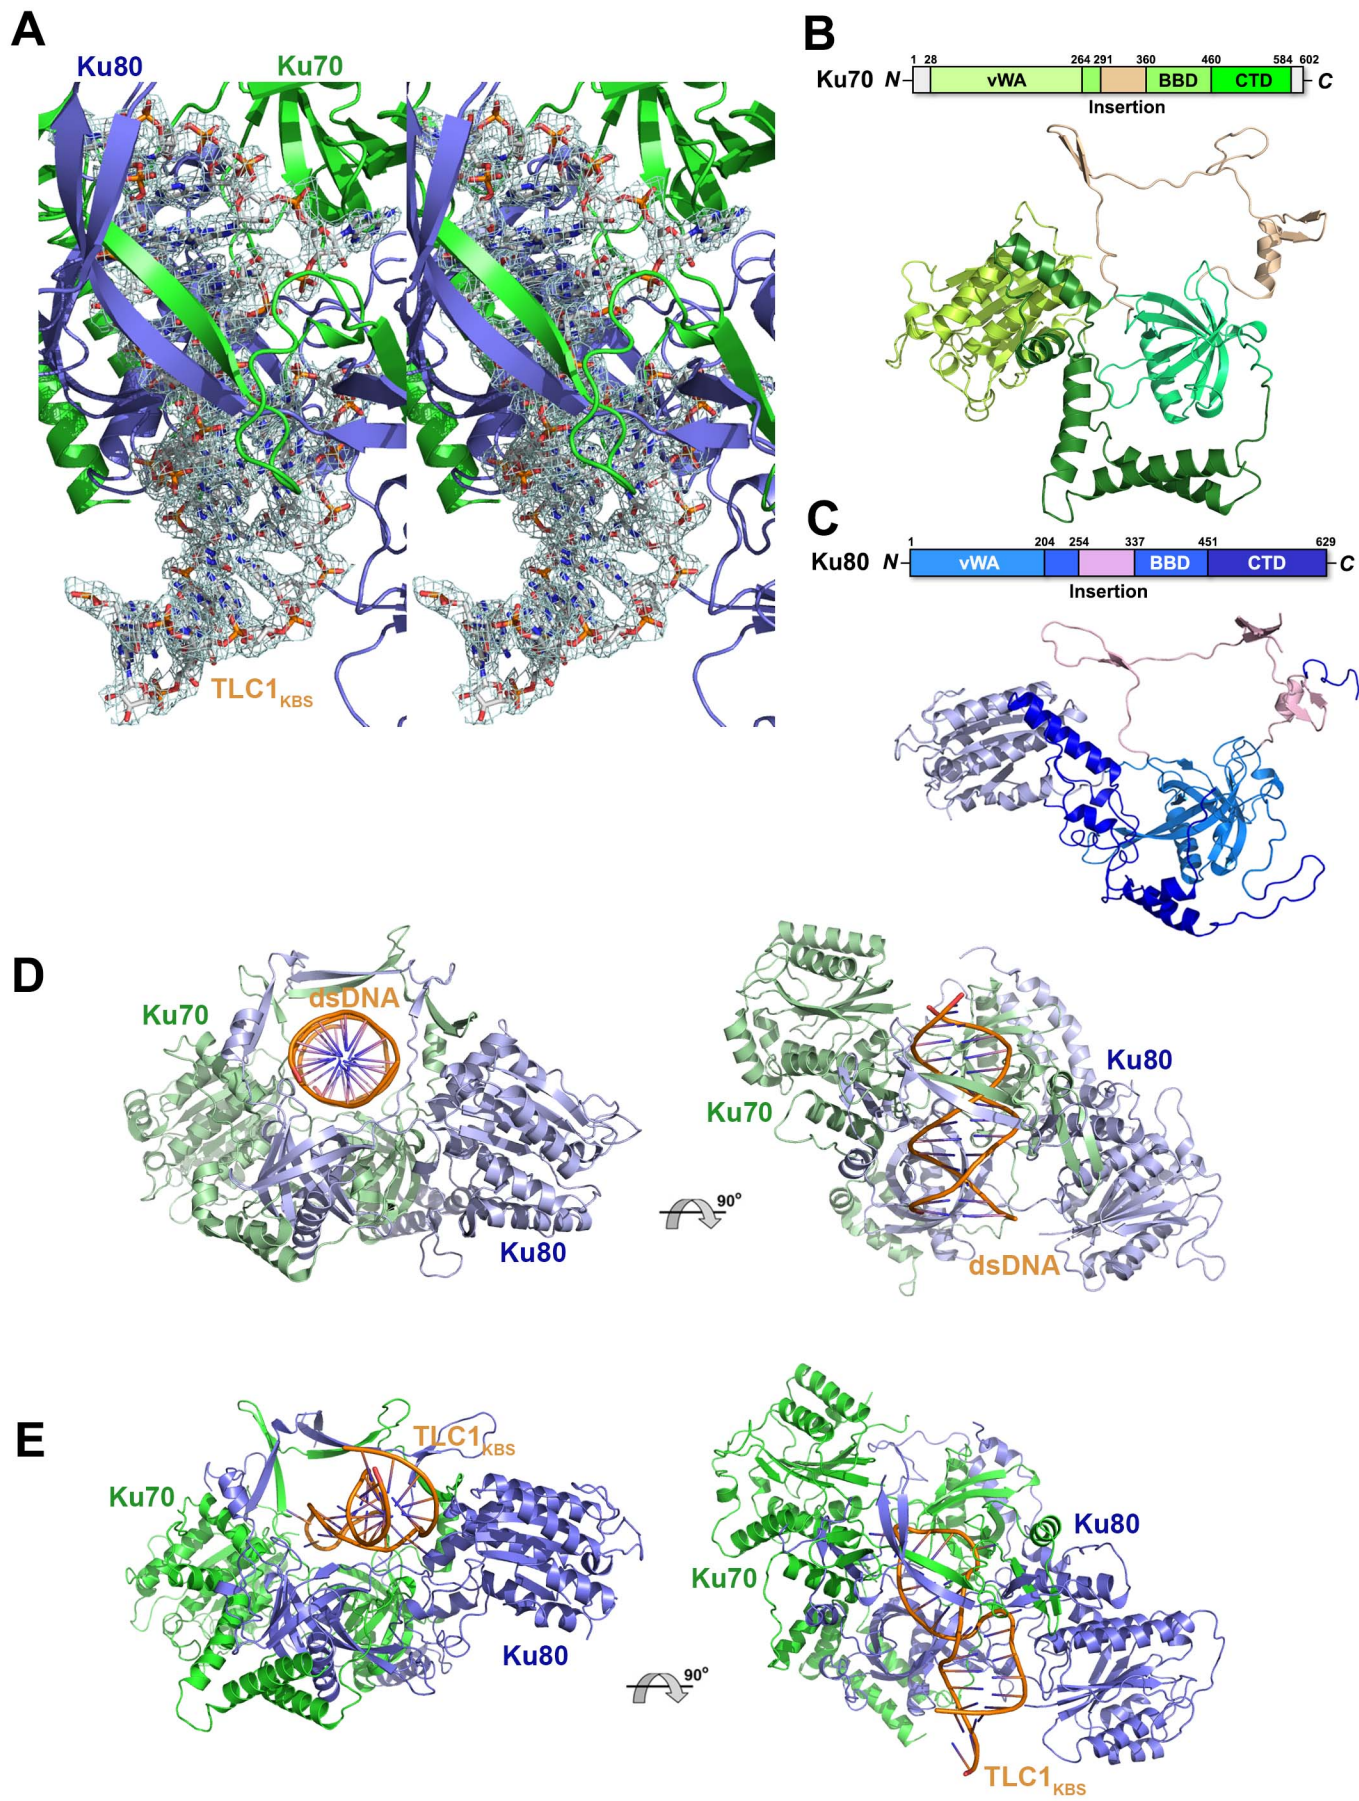

Figure S2

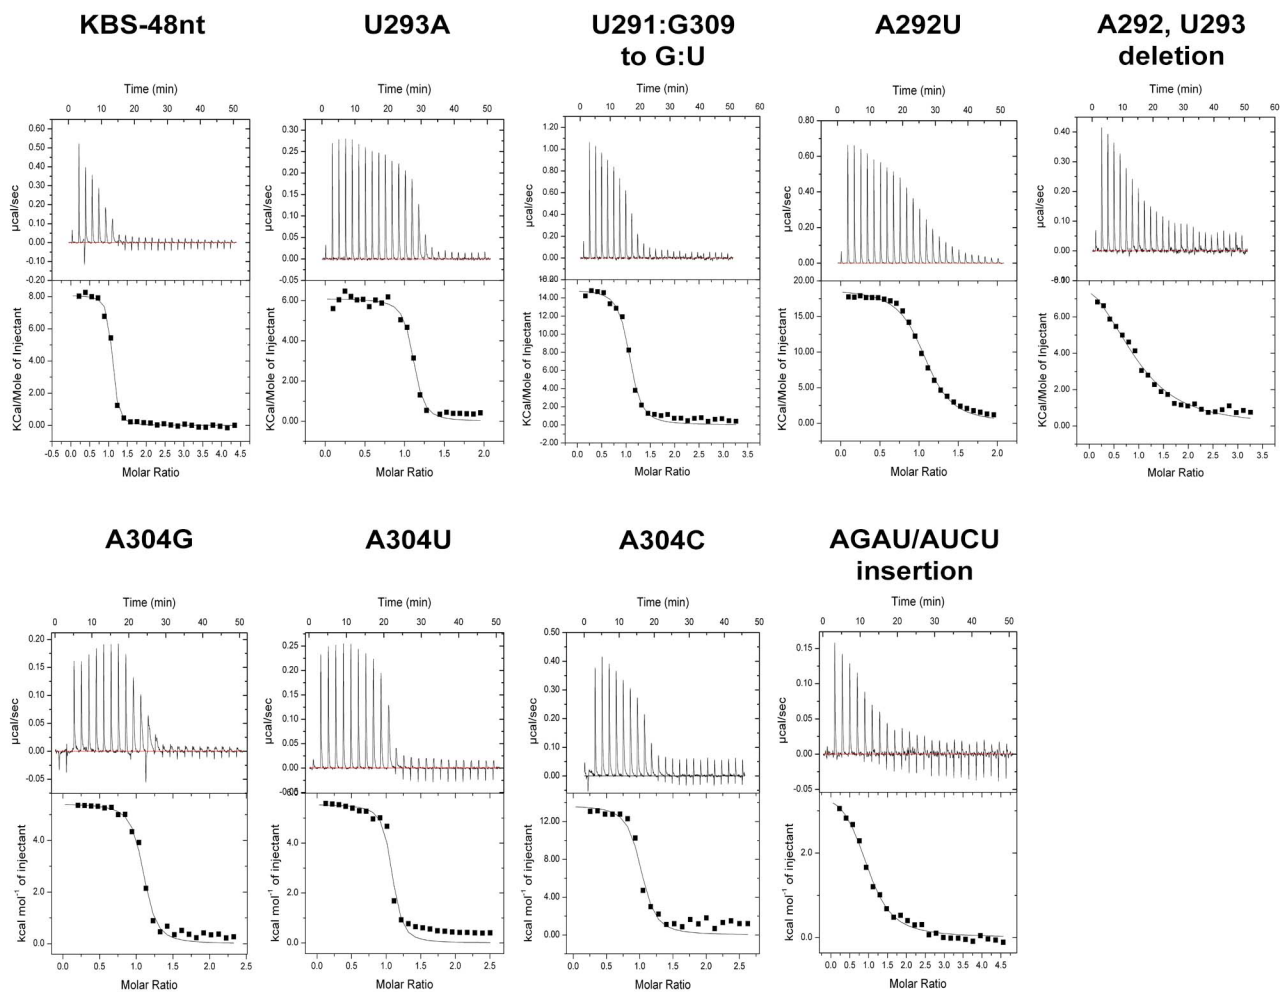

Figure S3

**A**

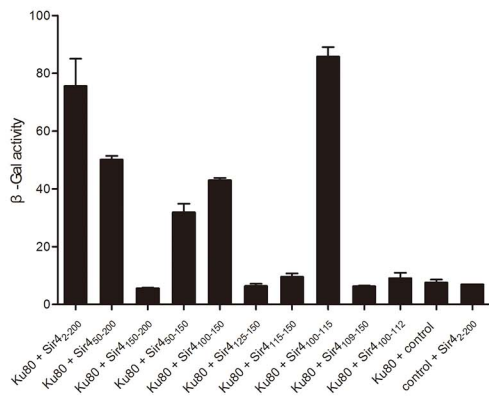

**B**

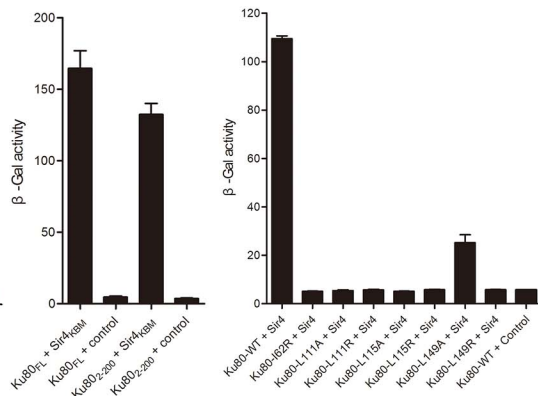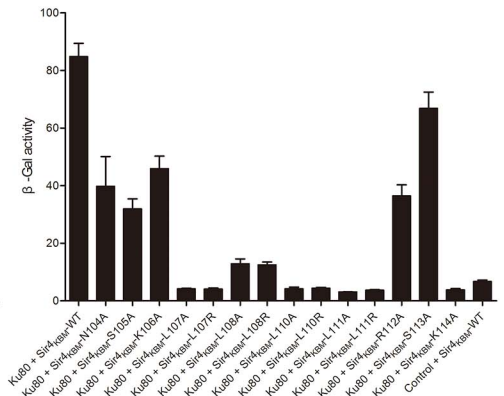

**C**

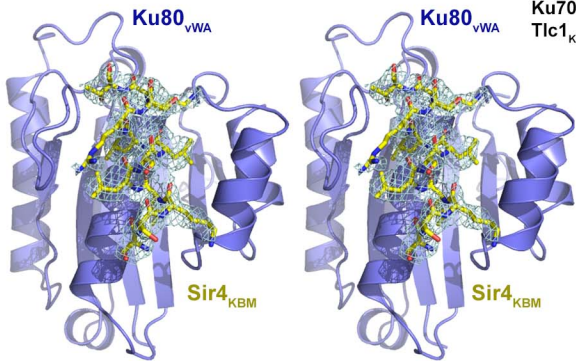

**D**

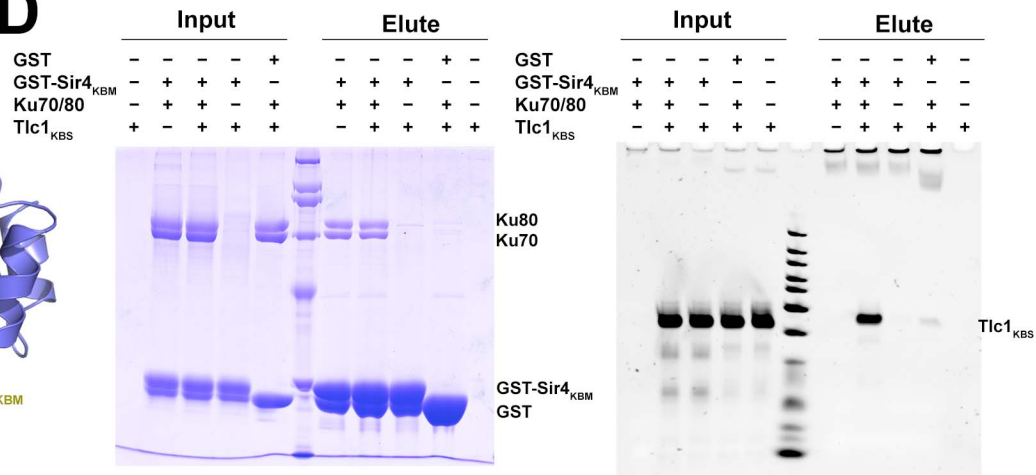

**E**

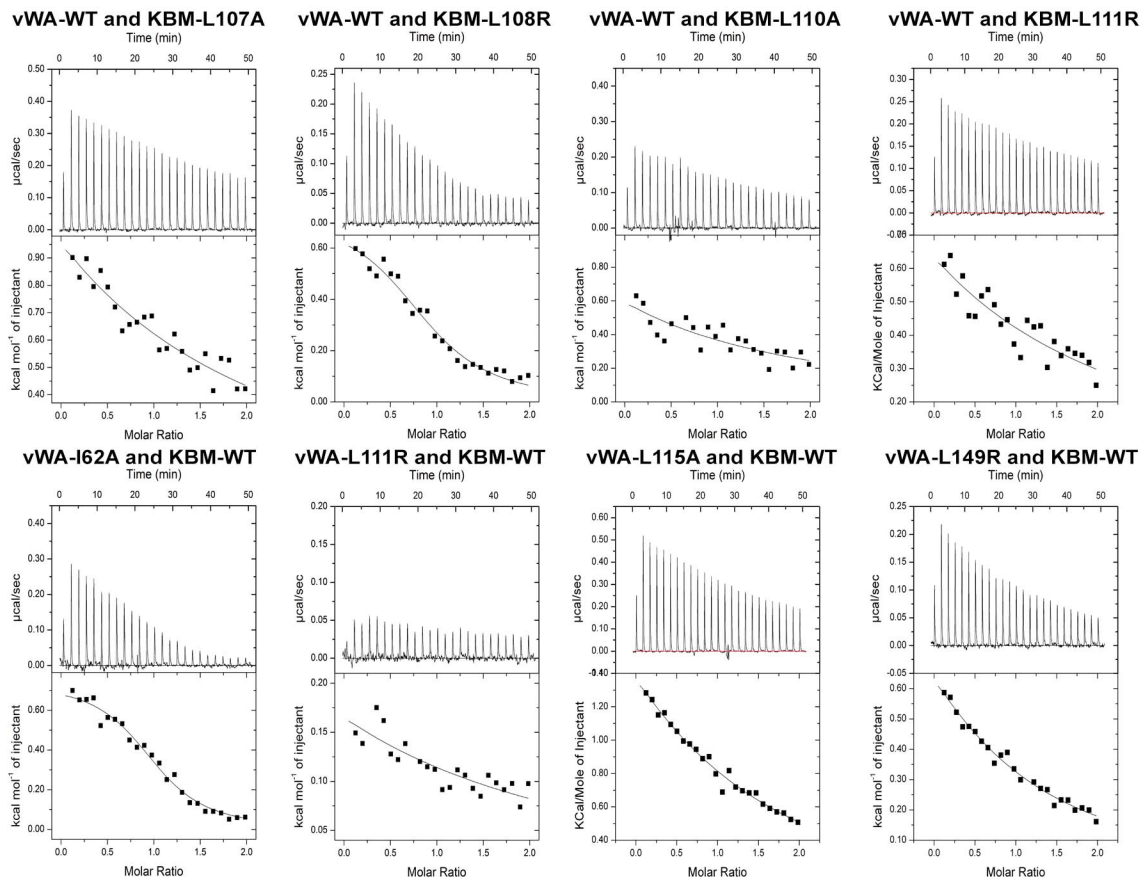



Figure S4

**A**

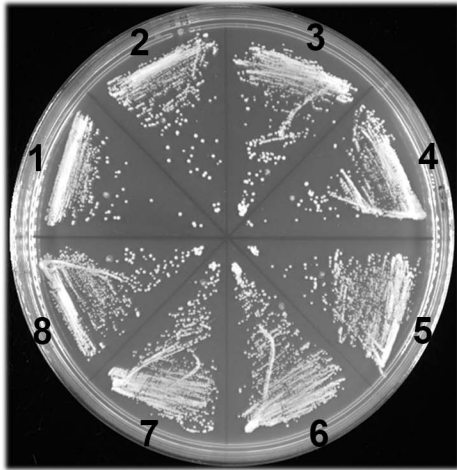

- 1: *sir4* $\Delta$
- 2: *sir4*<sup>WT</sup>
- 3: *sir4*<sup>L107A</sup>
- 4: *sir4*<sup>L107R</sup>
- 5: *sir4*<sup>L110A</sup>
- 6: *sir4*<sup>L110R</sup>
- 7: *sir4*<sup>L111A</sup>
- 8: *sir4*<sup>L111R</sup>

**B**

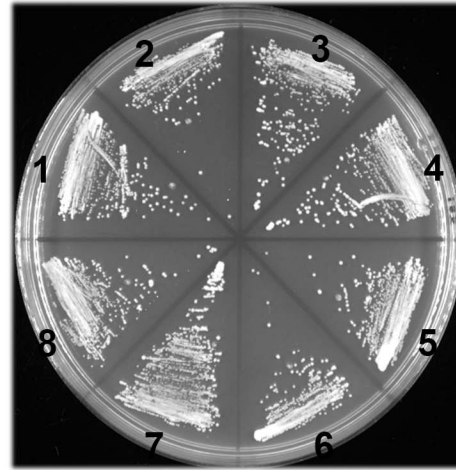

- 1: *ku80* $\Delta$
- 2: *ku80*<sup>WT</sup>
- 3: *ku80*<sup>I62R</sup>
- 4: *ku80*<sup>L111A</sup>
- 5: *ku80*<sup>L111R</sup>
- 6: *ku80*<sup>L115A</sup>
- 7: *ku80*<sup>L115R</sup>
- 8: *ku80*<sup>L149R</sup>

**C**

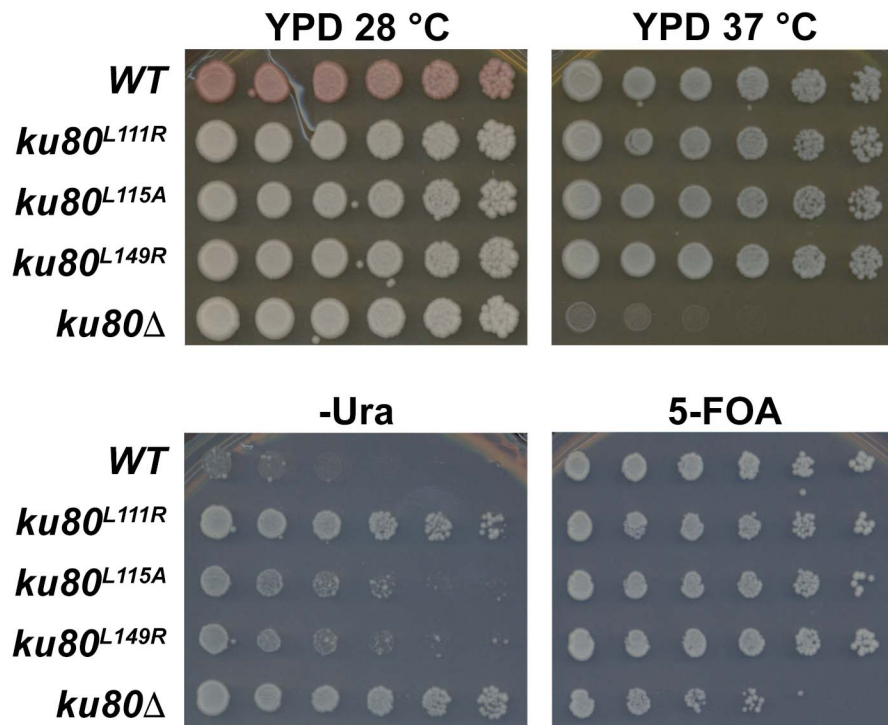

**D**

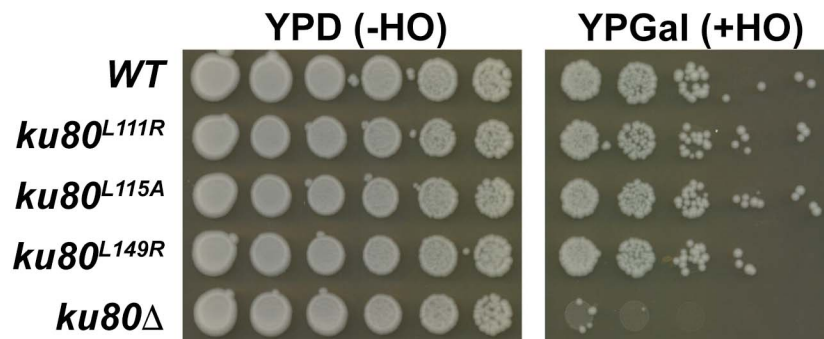

Figure S5

**A**

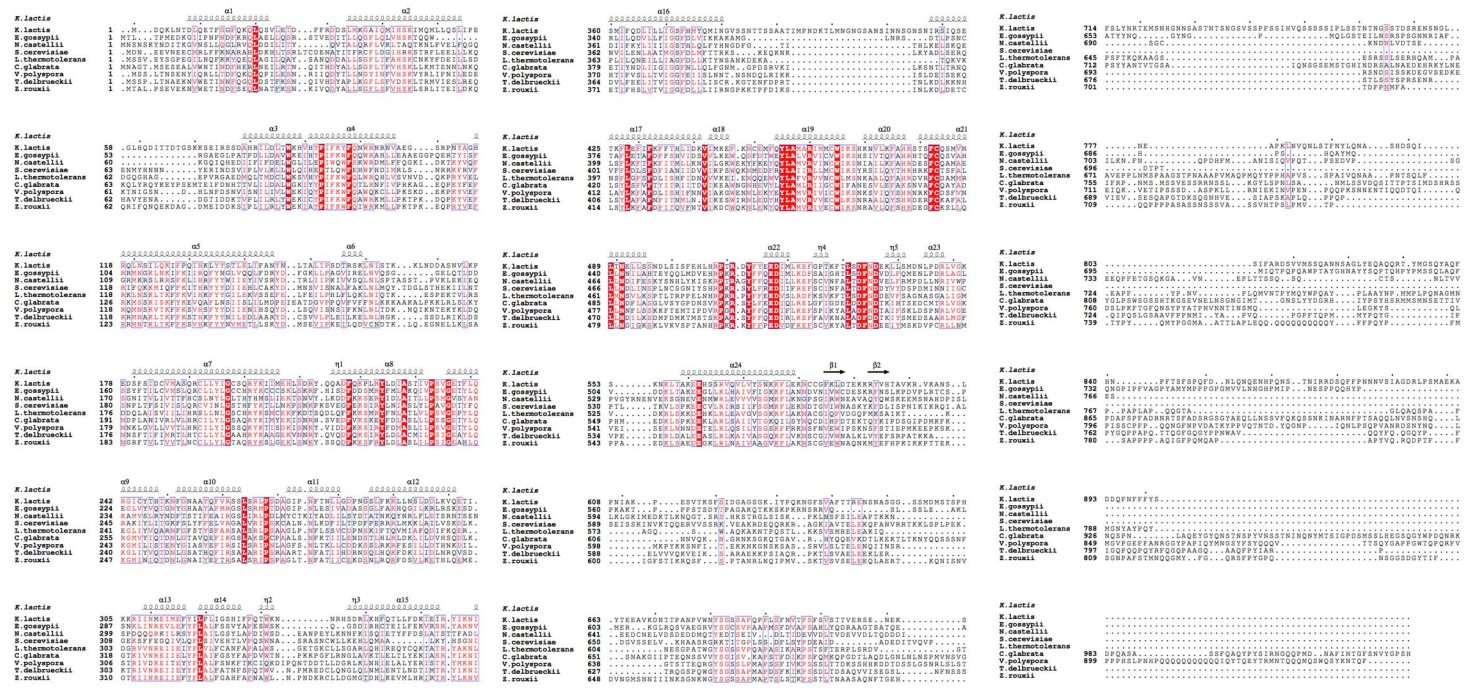

**B**

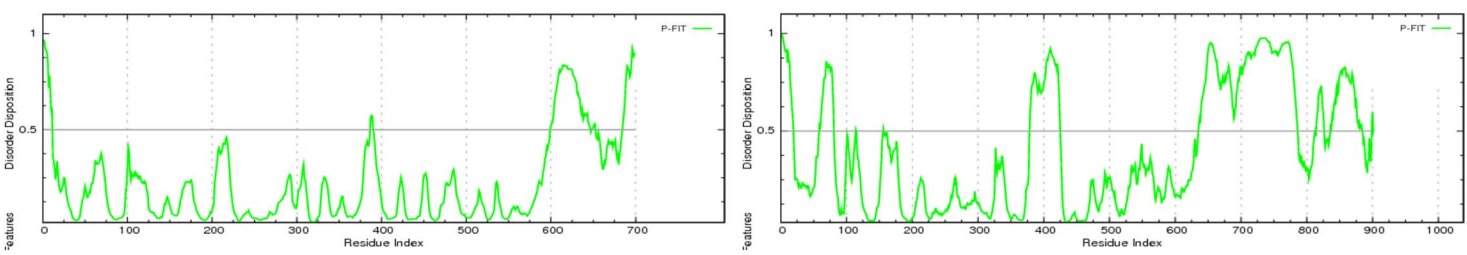

**C**

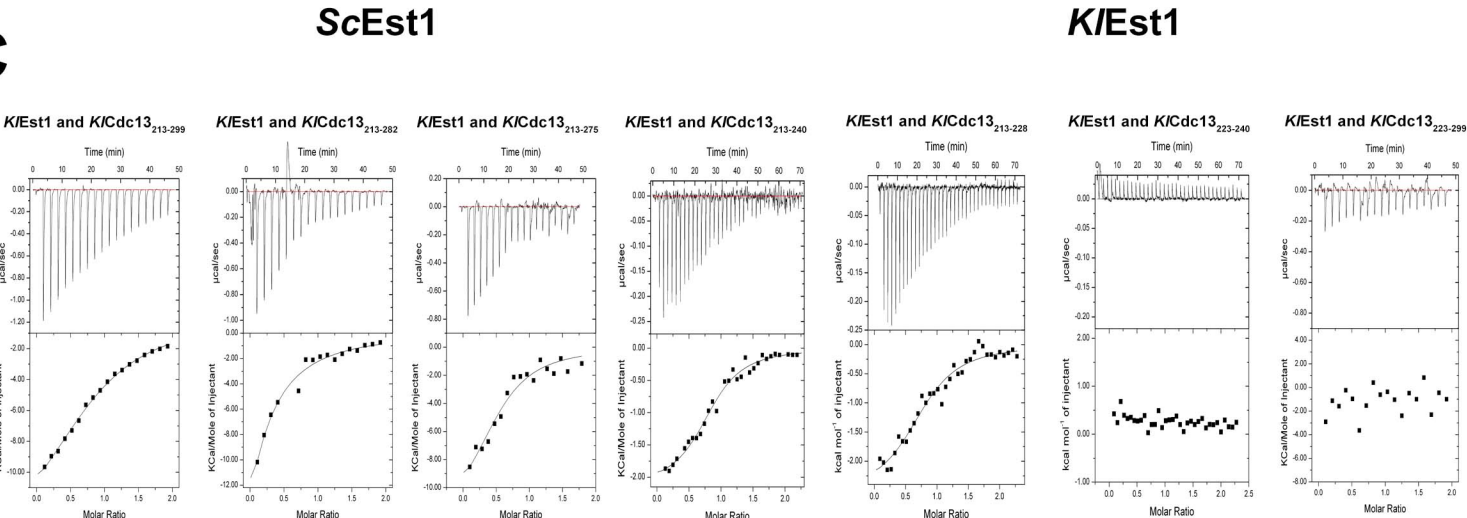

Figure S6

**A**

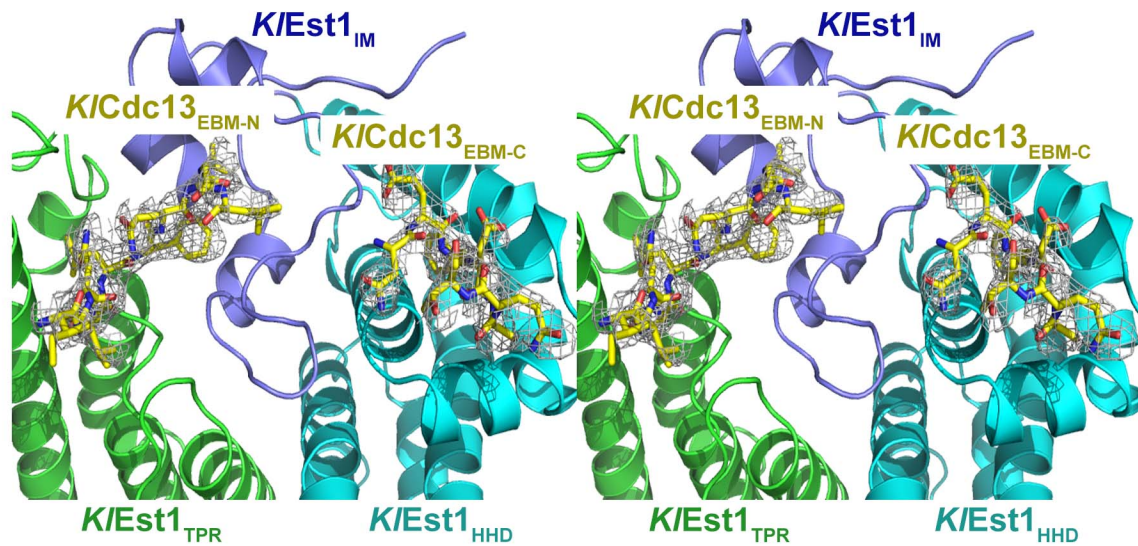

**B**

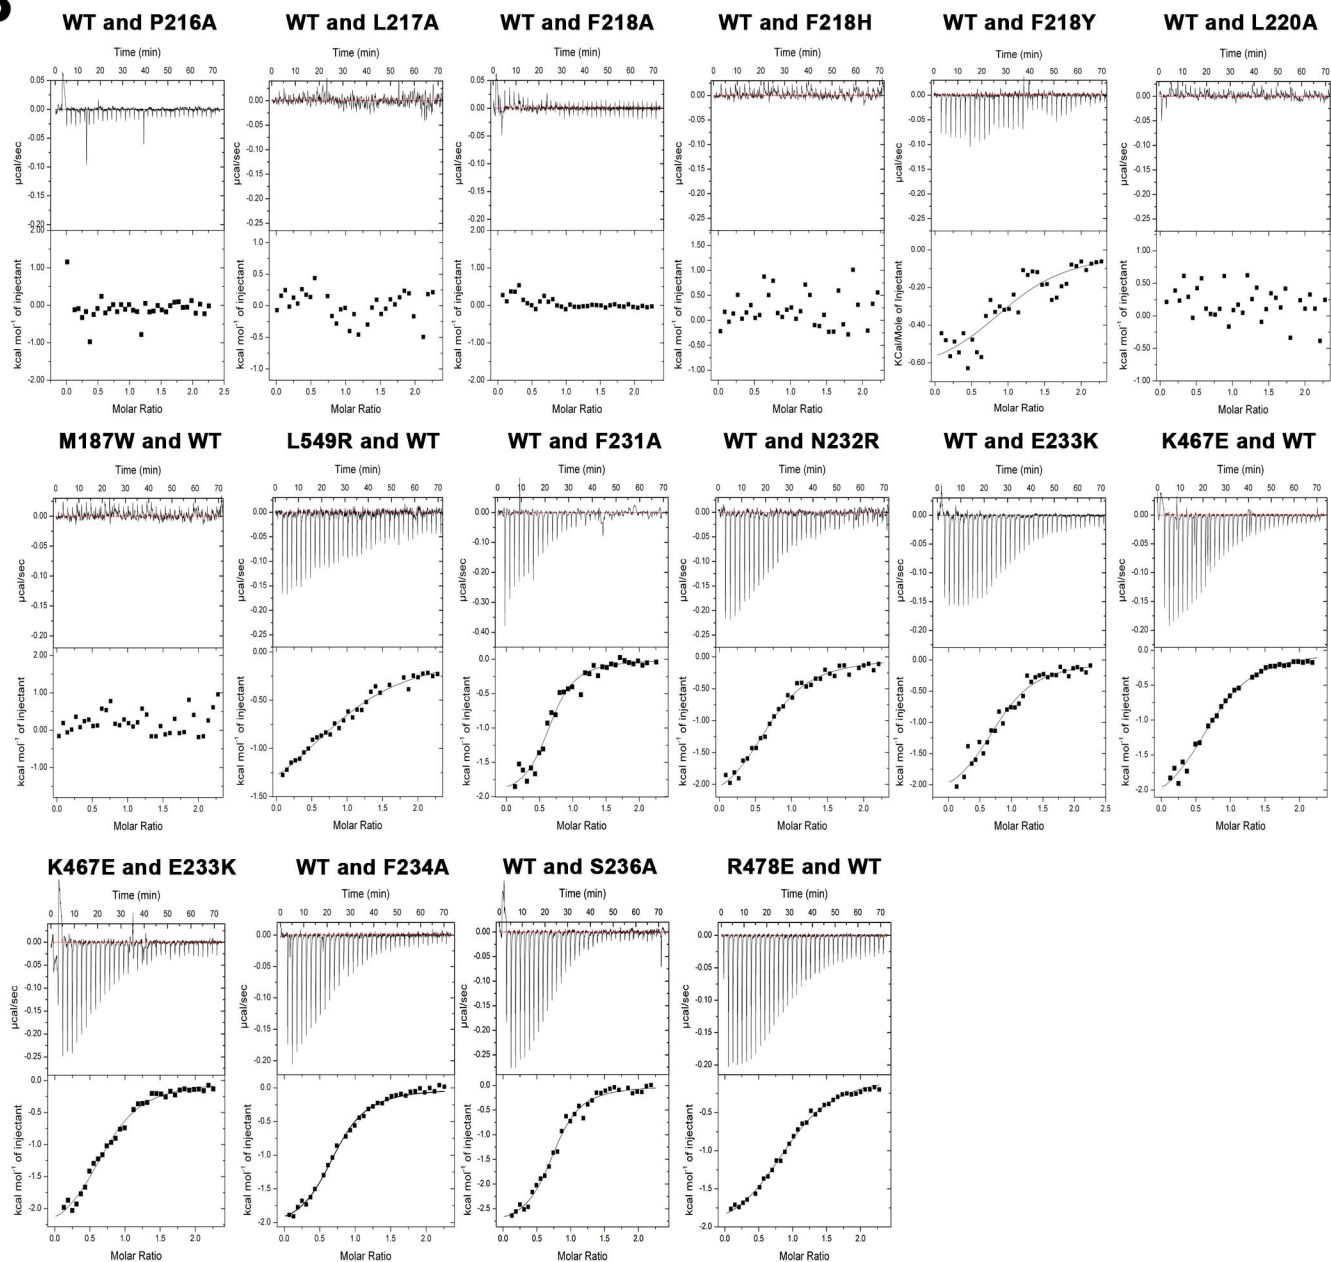

Figure S7

**A**

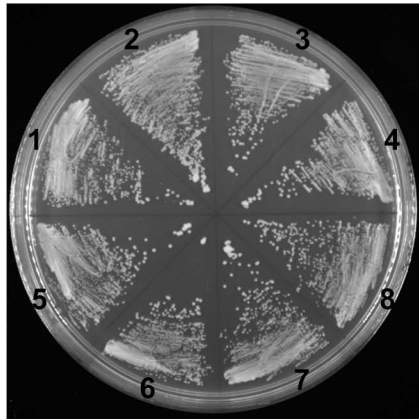

- 1: *cdc13*<sup>WT</sup> ×2
- 2: *cdc13*<sup>WT</sup> ×4
- 3: *cdc13*<sup>WT</sup> ×6
- 4: *cdc13*<sup>WT</sup> ×8
- 5: *cdc13*<sup>P235A</sup> ×2
- 6: *cdc13*<sup>P235A</sup> ×4
- 7: *cdc13*<sup>P235A</sup> ×6
- 8: *cdc13*<sup>P235A</sup> ×8

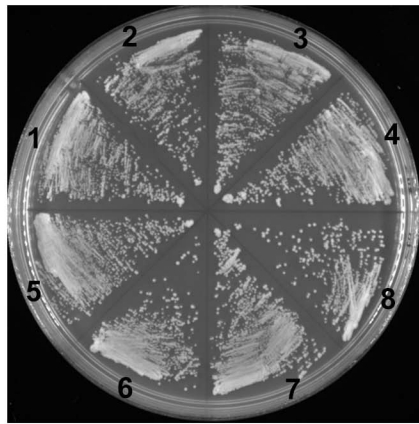

- 1: *cdc13*<sup>F237A</sup> ×2
- 2: *cdc13*<sup>F237A</sup> ×4
- 3: *cdc13*<sup>F237A</sup> ×6
- 4: *cdc13*<sup>F237A</sup> ×8
- 5: *cdc13*<sup>F237H</sup> ×2
- 6: *cdc13*<sup>F237H</sup> ×4
- 7: *cdc13*<sup>F237H</sup> ×6
- 8: *cdc13*<sup>F237H</sup> ×8

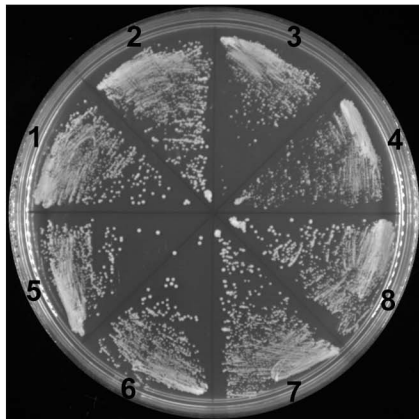

- 1: *cdc13*<sup>F237Y</sup> ×2
- 2: *cdc13*<sup>F237Y</sup> ×4
- 3: *cdc13*<sup>F237Y</sup> ×6
- 4: *cdc13*<sup>F237Y</sup> ×8
- 5: *cdc13*<sup>P239A</sup> ×2
- 6: *cdc13*<sup>P239A</sup> ×4
- 7: *cdc13*<sup>P239A</sup> ×6
- 8: *cdc13*<sup>P239A</sup> ×8

**B**

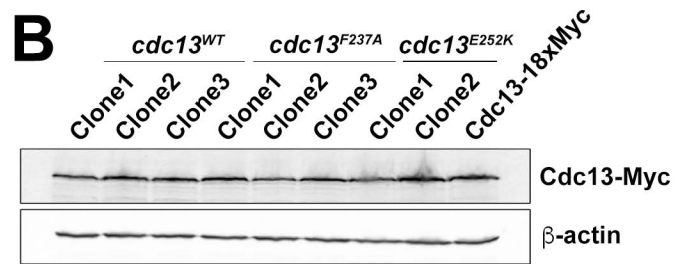

Cdc13 protein expression level

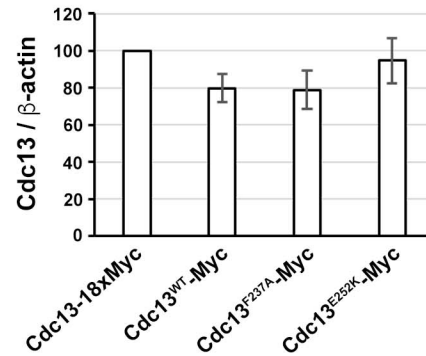

**C**

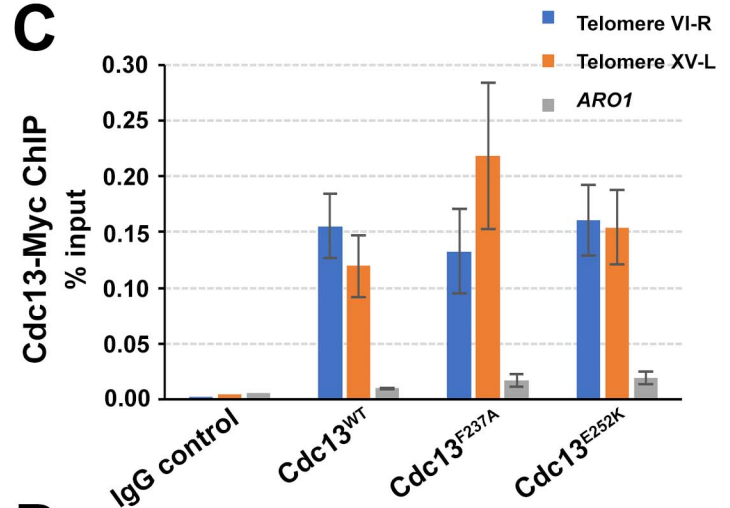

**D**

| Genotype                                                                     | Decrease in telomere length (bp) |
|------------------------------------------------------------------------------|----------------------------------|
| WT                                                                           | 0                                |
| <i>cdc13</i> <sup>F237A</sup>                                                | ~220                             |
| <i>tlc1</i> <sup><math>\Delta</math>AU</sup>                                 | ~130                             |
| <i>cdc13</i> <sup>F237A</sup> + <i>tlc1</i> <sup><math>\Delta</math>AU</sup> | ~300 (senesced)                  |
| <i>cdc13</i> <sup>F237A</sup> + <i>sir4</i> $\Delta$                         | ~300 (senesced)                  |
| <i>cdc13</i> <sup>F237A</sup> + <i>sir4</i> <sup>WT</sup>                    | ~280                             |
| <i>cdc13</i> <sup>F237A</sup> + <i>sir4</i> <sup>L107A</sup>                 | ~290 (senesced)                  |
| <i>cdc13</i> <sup>F237A</sup> + <i>sir4</i> <sup>L111R</sup>                 | ~290 (senesced)                  |
| <i>cdc13</i> <sup>F237A</sup> + <i>ku80</i> <sup>WT</sup>                    | ~220                             |
| <i>cdc13</i> <sup>F237A</sup> + <i>ku80</i> <sup>L111R</sup>                 | ~290 (senesced)                  |
| <i>cdc13</i> <sup>F237A</sup> + <i>ku80</i> <sup>L115A</sup>                 | ~290 (senesced)                  |

**Table S1. Crystal Data Collection and Refinement Statistics, Related to Figure 1**

|                                         | Ku70/80_TLC1 <sub>KBS</sub><br>(Native) | Ku70/80_TLC1 <sub>KBS</sub><br>(SeMet-SAD) |
|-----------------------------------------|-----------------------------------------|--------------------------------------------|
| <b>Data collection</b>                  |                                         |                                            |
| Wavelength (Å)                          | 0.97853                                 | 0.97853                                    |
| Space group                             | <i>P1</i>                               | <i>P1</i>                                  |
| Cell dimensions                         |                                         |                                            |
| a, b, c (Å)                             | 116.3, 115.2, 115.8                     | 115.4, 114.2, 115.1                        |
| $\alpha$ , $\beta$ , $\gamma$ (°)       | 77.4, 78.4, 63.7                        | 77.6, 78.7, 63.9                           |
| Resolution (Å)                          | 2.8                                     | 3.2                                        |
| $R_{\text{merge}}$ (%)                  | 7.6 (55.6) *                            | 9.3 (61.3) *                               |
| $I / \sigma I$                          | 16.3 (2.6) *                            | 12.6 (2.0) *                               |
| Completeness (%)                        | 93.9 (96.0) *                           | 98.8 (98.6) *                              |
| Redundancy                              | 3.8 (3.8) *                             | 23.5 (4.5) *                               |
| <b>Refinement</b>                       |                                         |                                            |
| Resolution (Å)                          | 44.11-2.80                              |                                            |
| No. of reflections                      | 118,137                                 |                                            |
| $R_{\text{work}} / R_{\text{free}}$ (%) | 21.5/25.8                               |                                            |
| No. of atoms                            |                                         |                                            |
| Ku70                                    | 13,647                                  |                                            |
| Ku80                                    | 13,444                                  |                                            |
| Tlc1 <sub>KBS</sub>                     | 1,923                                   |                                            |
| Water                                   | 306                                     |                                            |
| $B$ -factors (Å <sup>2</sup> )          |                                         |                                            |
| Ku70                                    | 61.1                                    |                                            |
| Ku80                                    | 77.7                                    |                                            |
| Tlc1 <sub>KBS</sub>                     | 63.9                                    |                                            |
| Water                                   | 40.9                                    |                                            |
| R.m.s. deviations                       |                                         |                                            |
| Bond lengths (Å)                        | 0.003                                   |                                            |
| Bond angles (°)                         | 0.587                                   |                                            |
| Ramachandran plot                       |                                         |                                            |
| Favored region                          | 97.3%                                   |                                            |
| Allowed region                          | 100.0%                                  |                                            |
| Outlier region                          | 0.0%                                    |                                            |

\*Highest resolution shell is shown in parenthesis

**Table S2. Crystal Data Collection and Refinement Statistics, Related to Figure 3**

|                                         | Ku80 <sub>vWA</sub> _Sir4 <sub>KBM</sub><br>(Native) | Ku80 <sub>vWA</sub> _Sir4 <sub>KBM</sub><br>(SeMet-SAD) |
|-----------------------------------------|------------------------------------------------------|---------------------------------------------------------|
| <b>Data collection</b>                  |                                                      |                                                         |
| Wavelength (Å)                          | 0.97851                                              | 0.97851                                                 |
| Space group                             | <i>P</i> 3 <sub>1</sub> 21                           | <i>P</i> 3 <sub>2</sub> 21                              |
| Cell dimensions                         |                                                      |                                                         |
| a, b, c (Å)                             | 79.5, 79.5, 82.9                                     | 79.2, 79.2, 165.7                                       |
| $\alpha$ , $\beta$ , $\gamma$ (°)       | 90.0, 90.0, 120.0                                    | 90.0, 90.0, 120.0                                       |
| Resolution (Å)                          | 2.4                                                  | 2.8                                                     |
| $R_{\text{merge}}$ (%)                  | 7.1 (88.8) *                                         | 10.9 (76.9) *                                           |
| $I / \sigma I$                          | 48.0 (1.8) *                                         | 24.6 (2.0) *                                            |
| Completeness (%)                        | 99.6 (96.2) *                                        | 99.7 (99.9) *                                           |
| Redundancy                              | 18.0 (11.4) *                                        | 19.1 (12.0) *                                           |
| <b>Refinement</b>                       |                                                      |                                                         |
| Resolution (Å)                          | 27.64-2.40                                           |                                                         |
| No. of reflections                      | 10,957                                               |                                                         |
| $R_{\text{work}} / R_{\text{free}}$ (%) | 20.1/24.8                                            |                                                         |
| No. of atoms                            |                                                      |                                                         |
| Ku80 <sub>vWA</sub>                     | 1,498                                                |                                                         |
| Sir4 <sub>KBM</sub>                     | 94                                                   |                                                         |
| Ion                                     | 5                                                    |                                                         |
| Water                                   | 35                                                   |                                                         |
| $B$ -factors (Å <sup>2</sup> )          |                                                      |                                                         |
| Ku80 <sub>vWA</sub>                     | 28.7                                                 |                                                         |
| Sir4 <sub>KBM</sub>                     | 44.4                                                 |                                                         |
| Ion                                     | 66.3                                                 |                                                         |
| Water                                   | 23.9                                                 |                                                         |
| R.m.s. deviations                       |                                                      |                                                         |
| Bond lengths (Å)                        | 0.010                                                |                                                         |
| Bond angles (°)                         | 1.306                                                |                                                         |
| Ramachandran plot                       |                                                      |                                                         |
| Favored region                          | 98.4%                                                |                                                         |
| Allowed region                          | 100.0%                                               |                                                         |
| Outlier region                          | 0.0%                                                 |                                                         |

\*Highest resolution shell is shown in parenthesis

**Table S3. Crystal Data Collection and Refinement Statistics, Related to Figure 5**

|                                                         | <i>K</i> / <i>Est1_K</i> / <i>Cdc13<sub>EBM</sub></i><br>(Native) | <i>K</i> / <i>Est1_K</i> / <i>Cdc13<sub>EBM</sub></i><br>(SeMet-SAD) |
|---------------------------------------------------------|-------------------------------------------------------------------|----------------------------------------------------------------------|
| <b>Data collection</b>                                  |                                                                   |                                                                      |
| Wavelength (Å)                                          | 0.97860                                                           | 0.97860                                                              |
| Space group                                             | <i>C2</i>                                                         | <i>C2</i>                                                            |
| Cell dimensions                                         |                                                                   |                                                                      |
| a, b, c (Å)                                             | 108.6, 41.7, 147.1                                                | 112.7, 42.5, 150.9                                                   |
| $\alpha$ , $\beta$ , $\gamma$ (°)                       | 90.0, 97.5, 90.0                                                  | 90.0, 98.0, 90.0                                                     |
| Resolution (Å)                                          | 2.2                                                               | 2.5                                                                  |
| <i>R</i> <sub>merge</sub> (%)                           | 10.1 (59.4) *                                                     | 11.3 (76.0) *                                                        |
| <i>I</i> / $\sigma$ <i>I</i>                            | 18.2 (1.9) *                                                      | 33.3 (2.2) *                                                         |
| Completeness (%)                                        | 91.8 (93.6) *                                                     | 94.7 (95.3) *                                                        |
| Redundancy                                              | 6.3 (5.8) *                                                       | 13.3 (11.8) *                                                        |
| <b>Refinement</b>                                       |                                                                   |                                                                      |
| Resolution (Å)                                          | 40.86-2.20                                                        |                                                                      |
| No. of reflections                                      | 30,684                                                            |                                                                      |
| <i>R</i> <sub>work</sub> / <i>R</i> <sub>free</sub> (%) | 17.6/22.5                                                         |                                                                      |
| No. of atoms                                            |                                                                   |                                                                      |
| Est1                                                    | 4,233                                                             |                                                                      |
| Cdc13 <sub>EBM</sub>                                    | 136                                                               |                                                                      |
| Water                                                   | 73                                                                |                                                                      |
| <i>B</i> -factors (Å <sup>2</sup> )                     |                                                                   |                                                                      |
| Est1                                                    | 65.4                                                              |                                                                      |
| Cdc13 <sub>EBM</sub>                                    | 89.0                                                              |                                                                      |
| Water                                                   | 53.8                                                              |                                                                      |
| R.m.s. deviations                                       |                                                                   |                                                                      |
| Bond lengths (Å)                                        | 0.005                                                             |                                                                      |
| Bond angles (°)                                         | 0.852                                                             |                                                                      |
| Ramachandran plot                                       |                                                                   |                                                                      |
| Favored region                                          | 99.0%                                                             |                                                                      |
| Allowed region                                          | 100.0%                                                            |                                                                      |
| Outlier region                                          | 0.0%                                                              |                                                                      |

\*Highest resolution shell is shown in parenthesis

**Table S4. Plasmids Used for This Study, Related to STAR Methods**

| Plasmid Name           | Description                         | Source               |
|------------------------|-------------------------------------|----------------------|
| pRS315                 | <i>CEN LEU2</i>                     | Gift from JQ Zhou    |
| pRS316                 | <i>CEN URA3</i>                     | Gift from JQ Zhou    |
| pRS415                 | <i>CEN LEU2</i>                     | Gift from JQ Zhou    |
| pRS303- <i>est1Δ</i>   | YIp <i>HIS3 est1Δ</i>               | Gift from JQ Zhou    |
| pVL1107                | <i>CEN LEU2 CDC13-EST2 fusion</i>   | Gift from JQ Zhou    |
| pCH249                 | <i>CEN LEU2 cdc13-2-EST2 fusion</i> | pVL1107              |
| pCH253                 | <i>CEN URA3 EST1</i>                | This study           |
| pCH254                 | <i>CEN URA3 est1-60</i>             | pCH253               |
| pRS305- <i>tlc1Δ</i>   | YIp <i>LUE2 tlc1Δ</i>               | Gift from JQ Zhou    |
| pRS303- <i>tlc1Δ</i>   | YIp <i>HIS3 tlc1Δ</i>               | pRS305- <i>tlc1Δ</i> |
| pRS316- <i>TLC1</i>    | <i>CEN URA3 TLC1</i>                | Gift from JQ Zhou    |
| pRS316- <i>tlc1Δ48</i> | <i>CEN URA3 tlc1Δ48</i>             | Gift from JQ Zhou    |
| pCH414                 | <i>CEN URA3 tlc1ΔAU</i>             | pRS315- <i>TLC1</i>  |
| pCH198                 | <i>CEN URA3 CDC13</i>               | This study           |
| pCH323                 | <i>CEN LUE2 CDC13</i>               | This study           |
| pCH324                 | <i>CEN LEU2 cdc13-P235A</i>         | pCH323               |
| pCH325                 | <i>CEN LEU2 cdc13-F237A</i>         | pCH323               |
| pCH326                 | <i>CEN LEU2 cdc13-E252K</i>         | pCH323               |
| pCH327                 | <i>CEN LEU2 cdc13-F253A</i>         | pCH323               |
| pCH328                 | <i>CEN LEU2 cdc13-S255A</i>         | pCH323               |
| pCH395                 | <i>CEN LEU2 cdc13-F237H</i>         | pCH323               |
| pCH396                 | <i>CEN LEU2 cdc13-F237Y</i>         | pCH323               |
| pCH397                 | <i>CEN LEU2 cdc13-P239A</i>         | pCH323               |
| pCH407                 | YIp <i>HIS3 sir4Δ</i>               | This study           |
| pCH408                 | <i>CEN URA3 SIR4</i>                | This study           |
| pCH416                 | <i>CEN URA3 sir4-L107R</i>          | pCH408               |
| pCH420                 | <i>CEN URA3 sir4-L111R</i>          | pCH408               |
| pRS303- <i>ku80Δ</i>   | YIp <i>HIS3 ku80Δ</i>               | Gift from JQ Zhou    |
| pCH410                 | <i>CEN LEU2 KU80</i>                | This study           |
| pCH427                 | <i>CEN LEU2 ku80-L111R</i>          | pCH410               |
| pCH428                 | <i>CEN LEU2 ku80-L115A</i>          | pCH410               |
| pMLW323                | <i>CEN LEU2 CDC13</i>               | This study           |
| pMLW324                | <i>CEN LEU2 cdc13-F237A</i>         | pMLW323              |
| pMLW325                | <i>CEN LEU2 cdc13-E252K</i>         | pMLW323              |



**Table S5. Yeast Strains Used for This Study, Related to STAR Methods**

| Strain Name | Genotype                                                                                                                                                                | Source                       |
|-------------|-------------------------------------------------------------------------------------------------------------------------------------------------------------------------|------------------------------|
| yCH001      | <i>MATa/α his3Δ1/his3Δ1 leu2Δ0/leu2Δ0<br/>LYS2/lys2Δ0 met15Δ0/MET15 ura3Δ0/ura3Δ0<br/>CDC13/cdc13Δ::Kanr</i>                                                            | Euroscarf, SRD GmbH          |
| yCH002      | <i>MATa/α his3Δ1/his3Δ1 leu2Δ0/leu2Δ0<br/>LYS2/lys2Δ0 met15Δ0/MET15 ura3Δ0/ura3Δ0<br/>CDC13/cdc13Δ::kanr EST1/est1Δ::HIS3</i>                                           | yCH001                       |
| yCH005      | <i>MATα (or MATa) his3Δ1 leu2Δ0 lys2Δ0 (or<br/>met15Δ0) ura3Δ0 cdc13Δ::kanr pCH198(CEN<br/>URA3 CDC13)</i>                                                              | yCH001                       |
| yCH051      | <i>MATa/α his3Δ1/his3Δ1 leu2Δ0/leu2Δ0<br/>LYS2/lys2Δ0 met15Δ0/MET15 ura3Δ0/ura3Δ0<br/>CDC13/cdc13Δ::kanr KU80/ku80Δ::HIS3</i>                                           | yCH001                       |
| yCH052      | <i>MATa/α his3Δ1/his3Δ1 leu2Δ0/leu2Δ0<br/>LYS2/lys2Δ0 met15Δ0/MET15 ura3Δ0/ura3Δ0<br/>CDC13/cdc13Δ::kanr TLC1/tlc1Δ::HIS3</i>                                           | yCH001                       |
| yCH133      | <i>MATα his3Δ1 leu2Δ0 lys2Δ0 ura3Δ0<br/>ku80Δ::kanr</i>                                                                                                                 | Euroscarf, SRD GmbH          |
| yCH134      | <i>MATα his3Δ1 leu2Δ0 lys2Δ0 ura3Δ0<br/>sir4Δ::kanr</i>                                                                                                                 | Euroscarf, SRD GmbH          |
| yCH143      | <i>MATα (or MATa) his3Δ1 leu2Δ0 lys2Δ0 (or<br/>met15Δ0) ura3Δ0 cdc13Δ::kanr sir4Δ::HIS3<br/>pCH198(CEN URA3 CDC13)</i>                                                  | yCH005                       |
| yDZ651      | <i>MATα (or MATa) his3Δ1 leu2Δ0 lys2Δ0 (or<br/>met15Δ0) ura3Δ0 cdc13Δ::kanr sir4Δ::HIS3<br/>pCH198(CEN URA3 CDC13) EST2-Gly8-<br/>myc13::LYS2</i>                       | yCH143                       |
| UCC3505     | <i>MATα ura3-52 lys2-801 ade2-101 trp1-Δ63<br/>his3-Δ200 leu2-Δ1 ppr1::HIS3 adh4::URA3-<br/>(URA3 at TEL VIII) DIA5-1 (ADE2 at TEL<br/>VR)</i>                          | Singer and Gottschling, 1994 |
| YVL885      | <i>MATα yku80-Δ::kan<sup>r</sup> ura3-52 lys2-801 ade2-<br/>101 trp1-Δ63 his3-Δ200 leu2-Δ1 ppr1::HIS3<br/>adh4::URA3-(URA3 at TEL VIII) DIA5-1<br/>(ADE2 at TEL VR)</i> | Bertuch and Lundblad, 2003   |
| YAB1010     | <i>MATα yku80-L111R ura3-52 lys2-801 ade2-101<br/>trp1-Δ63 his3-Δ200 leu2-Δ1 ppr1::HIS3<br/>adh4::URA3-(URA3 at TEL VIII) DIA5-1<br/>(ADE2 at TEL VR)</i>               | UCC3505                      |
| YAB1011     | <i>MATα yku80-L115A ura3-52 lys2-801 ade2-101<br/>trp1-Δ63 his3-Δ200 leu2-Δ1 ppr1::HIS3<br/>adh4::URA3-(URA3 at TEL VIII) DIA5-1<br/>(ADE2 at TEL VR)</i>               | UCC3505                      |
| YAB1012     | <i>MATα yku80-L149R ura3-52 lys2-801 ade2-101<br/>trp1-Δ63 his3-Δ200 leu2-Δ1 ppr1::HIS3<br/>adh4::URA3-(URA3 at TEL VIII) DIA5-1<br/>(ADE2 at TEL VR)</i>               | UCC3505                      |

|         |                                                                                                                                     |                  |
|---------|-------------------------------------------------------------------------------------------------------------------------------------|------------------|
| JKM139  | <i>MATα hml-Δ::ADE1 hmr-Δ::ADE1 ade1-110 leu2,3-112 lys5 trp1-Δ::hisG ura3-52 ade3::GAL10 HO</i>                                    | Lee et al., 1998 |
| YAB795  | <i>MATα yku80-Δ::kan<sup>r</sup> YKU70-TAF hml-Δ::ADE1 hmr-Δ::ADE1 ade1-110 leu2,3-112 lys5 trp1-Δ::hisG ura3-52 ade3::GAL10 HO</i> | JKM139           |
| YAB1013 | <i>MATα yku80-L111R hml-Δ::ADE1 hmr-Δ::ADE1 ade1-110 leu2,3-112 lys5 trp1-Δ::hisG ura3-52 ade3::GAL10 HO</i>                        | JKM139           |
| YAB1014 | <i>MATα yku80-L115A hml-Δ::ADE1 hmr-Δ::ADE1 ade1-110 leu2,3-112 lys5 trp1-Δ::hisG ura3-52 ade3::GAL10 HO</i>                        | JKM139           |
| YAB1015 | <i>MATα yku80-L149R hml-Δ::ADE1 hmr-Δ::ADE1 ade1-110 leu2,3-112 lys5 trp1-Δ::hisG ura3-52 ade3::GAL10 HO</i>                        | JKM139           |
|         | <i>MATα his3Δ1 leu2Δ0 LYS2 ura3Δ0 cdc13Δ::Kanr pMLW323 (CEN LEU2 CDC13) Est1-13Myc::TRP1</i>                                        | yCH001           |
|         | <i>MATα his3Δ1 leu2Δ0 LYS2 ura3Δ0 cdc13Δ::Kanr pMLW325 (CEN LEU2 cdc13-F237A) Est1-13Myc::TRP1</i>                                  | yCH001           |
|         | <i>MATα his3Δ1 leu2Δ0 LYS2 ura3Δ0 cdc13Δ::Kanr pMLW326 (CEN LEU2 cdc13-E252K) Est1-13Myc::TRP1</i>                                  | yCH001           |
|         | <i>MATα his3Δ1 leu2Δ0 LYS2 ura3Δ0 cdc13Δ::Kanr pMLW323 (CEN LEU2 CDC13) Est2-13Myc::TRP1</i>                                        | yCH001           |
|         | <i>MATα his3Δ1 leu2Δ0 LYS2 ura3Δ0 cdc13Δ::Kanr pMLW325 (CEN LEU2 cdc13-F237A) Est2-13Myc::TRP1</i>                                  | yCH001           |
|         | <i>MATα his3Δ1 leu2Δ0 LYS2 ura3Δ0 cdc13Δ::Kanr pMLW326 (CEN LEU2 cdc13-E252K) Est2-13Myc::TRP1</i>                                  | yCH001           |
